# Supplementary material for: Effects of CRISPR/Cas9-mediated stearoyl-Coenzyme A desaturase 1 knockout on mouse embryo development and lipid synthesis
Source: PeerJ. 2022 Sep 14;10:e13945. doi: 10.7717/peerj.13945 (PMC9482360; doi:10.7717/peerj.13945)
Supplement: Supplemental Information 1 [file peerj-10-13945-s001.xlsx]

## Sheet: Table1
Table 1
Cell cycle phase for injection	Number of injected embryos	Number of survival embryos
G1 phase	159	55
S phase	130	124
G2 phase	139	122

## Sheet: Table3
Table 3
Treatment	Total Number of zygotes	Number of morulae	Number of blastocysts
RNase-free water	60	16	29
NC sgRNA/Cas9 mRNA	73	24	23
SCD1 sgRNA/Cas9 mRNA	95	37	21

## Sheet: Figure4
Figure 4
Protein level of SCD1	WT	SCD1-KO
	0.93684	0.80333
	1.05347	0.593918
	1.04472	0.458626
Body weight
Time(Week)	WT			SCD1-KO
1	6	7	7	7	6	6
2	10	11	12	9	7	9
3	13	15	16	13	9	10
4	17	21	22	12	17	12
5	20	23	23	12	18	13
6	23	24	24	16	16	15
7	24	25	25	19	17	18
8	24	25	26	18	19	20
Serum triacylglycerol/mM	WT	SCD1-KO
	0.192	0.150788
	0.204121	0.151394
	0.196849	0.158061
Serum cholesterol/mM	WT	SCD1-KO
	0.406537	0.297263
	0.436515	0.306934
	0.38623	0.297263
